# Supplementary material for: Direct reprogramming of human fibroblasts into dopaminergic neuron-like cells
Source: PubMed Central journal article supplement — Cell Res. 2011 Nov 22;22(2):321–32. doi: 10.1038/cr.2011.181 (PMC3271588; doi:10.1038/cr.2011.181), 2011-11-22
Supplement: cr2011181x2.pdf [file cr2011181x2.pdf]

**Table S2. A summary of various neuron-specific proteins used to identify DA-neurons.**

| <b>Transcription factor</b> | <b>Description</b>                                                                                                                                                                                                                  | <b>Markers</b>                      |
|-----------------------------|-------------------------------------------------------------------------------------------------------------------------------------------------------------------------------------------------------------------------------------|-------------------------------------|
| EN1                         | Encode homeodomain-containing proteins and implicate in the control of pattern formation during development of the central nervous system                                                                                           | mature mDA neurons                  |
| TH                          | An enzyme responsible for catalyzing the amino acid L-tyrosine to dihydroxyphenylalanine (DOPA). The rate-determining initial step in the biosynthesis of catecholamines such as dopamine, noradrenaline and adrenaline             | mDA synthesis marker                |
| DAT                         | An membrane-spanning protein that pumps the neurotransmitter dopamine out of the synapse back into cytosol. Mediate the active reuptake of dopamine from the synapse and is a principal regulator of dopaminergic neurotransmission | mDA uptake marker                   |
| DDC                         | A lyase enzyme that implicate in two metabolic pathways, synthesizing two important neurotransmitters, dopamine and serotonin                                                                                                       | mDA synthesis marker                |
| Vmat2                       | An integral membrane protein that acts to transport cytosolic monoamines into synaptic vesicles, using the proton gradient maintained across the synaptic vesicular membrane                                                        | mDA storage marker                  |
| CHAT                        | An enzyme that catalyzes the biosynthesis of acetylcholine                                                                                                                                                                          | Cholinergic neuron marker           |
| SLC32A1                     | An integral membrane protein involved in gamma-aminobutyric acid (GABA) and glycine uptake into synaptic vesicles                                                                                                                   | GABAergic neuron marker             |
| SLC6A4                      | An integral membrane protein that transports the neurotransmitter serotonin from synaptic spaces into presynaptic neurons                                                                                                           | Serotonin transporter neuron marker |
