# Supplementary material for: Direct reprogramming of human fibroblasts into dopaminergic neuron-like cells
Source: PubMed Central journal article supplement — Cell Res. 2011 Nov 22;22(2):321–32. doi: 10.1038/cr.2011.181 (PMC3271588; doi:10.1038/cr.2011.181), 2011-11-22
Supplement: cr2011181x3.pdf [file cr2011181x3.pdf]

**Table S3 Primers used for quantitative and semi-quantitative PCR (Figure 1D).**

| Symbol        | Primers(5'-3')             | Usage              |
|---------------|----------------------------|--------------------|
| hEN1-S1794    | CCCGTGGTCAAACACTGACTC      | RT-PCR for EN1     |
| hEN1-AS1885   | CTTCTTCAGCTTCCTGGTGC       |                    |
| hTH-S321      | CTGTGGCCTTTGAGGAGAAG       | RT-PCR for TH      |
| hTH-AS427     | GGTGGATTTTGGCTTCAAAC       |                    |
| hDAT-S753     | CACCTGCTGCCGAGTACTTT       | RT-PCR for DAT     |
| hDAT-AS857    | TAGAGCAGCACGATGACCAG       |                    |
| hDDC-S1378    | CGCCAGGATCCCCGCTTTGAAATCTG | RT-PCR for DDC     |
| hDDC-AS1594   | TCGGCCGCCAGCTCTTTGATGTGTTC |                    |
| hVmat2-S1195  | CTTTGGAGTTGGTTTTGC         | RT-PCR for Vmat2   |
| hVmat2-AS1478 | GCAGTTGTGGTCCATGAG         |                    |
| hChat-S1360   | GGAGGCGTGGAGCTCAGCGACACC   | RT-PCR for Chat    |
| hChat-AS1592  | CGGGGAGCTCGCTGACGGAGTCTG   |                    |
| hSLC32A1-S    | CTGGAACGTGACCAACGCCATC     | RT-PCR for SLC32A1 |
| hSLC32A1-AS   | TCATTCTCCTCGTACAGGCACG     |                    |
| hSLC6A4-S     | TCACAGTGCTCGGTTACATGGC     | RT-PCR for SLC6A4  |
| hSLC6A4-AS    | GAAAGTGGACGCTGGCATGTTG     |                    |
