# Supplementary material for: Direct reprogramming of human fibroblasts into dopaminergic neuron-like cells
Source: PubMed Central journal article supplement — Cell Res. 2011 Nov 22;22(2):321–32. doi: 10.1038/cr.2011.181 (PMC3271588; doi:10.1038/cr.2011.181), 2011-11-22
Supplement: cr2011181x8.pdf [file cr2011181x8.pdf]

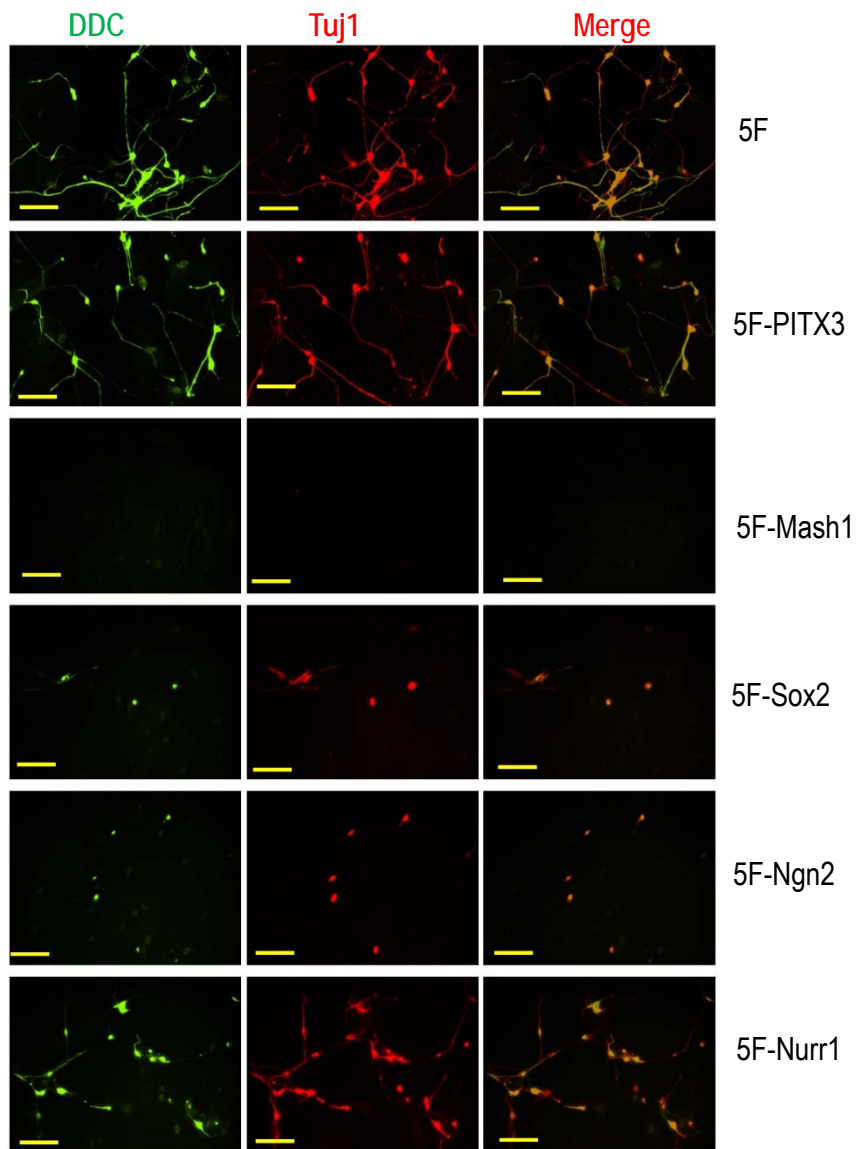

|          | DDC <sup>+</sup> / DIV18 (%) <sup>*</sup> | DDC <sup>+</sup> / DIV0 (%) <sup>**</sup> |
|----------|-------------------------------------------|-------------------------------------------|
| 5F-Mash1 | 0                                         | 0                                         |
| 5F-Sox2  | 17.65±4.07                                | 4.08±1.88                                 |
| 5F-Ngn2  | 8.82±2.55                                 | 0.28±0.17                                 |
| 5F-Nurr1 | 33.14±5.18                                | 1.07±0.34                                 |
| 5F-Pitx3 | 46.46±4.19                                | 1.48±0.31                                 |
| 5F       | 41.61±3.06                                | 1.43±0.21                                 |

Note: \*: The percent of DDC positive cells on DIV18; \*\*: The amount of DDC positive cells on DIV18 / the amount of cells on DIV0.

Figure S2. Top panel: Requirement for individual transcription factors in reprogramming of IMR90 cells into DA neuron-like cells. Size bars represent 200  $\mu$ m. Lower panel: fraction of cells that stained positive for DDC at day 18 post gene transduction. Relative fraction compared to day 0 cell number is also shown.
