# Supplementary material for: Direct reprogramming of human fibroblasts into dopaminergic neuron-like cells
Source: PubMed Central journal article supplement — Cell Res. 2011 Nov 22;22(2):321–32. doi: 10.1038/cr.2011.181 (PMC3271588; doi:10.1038/cr.2011.181), 2011-11-22
Supplement: cr2011181x9.pdf [file cr2011181x9.pdf]

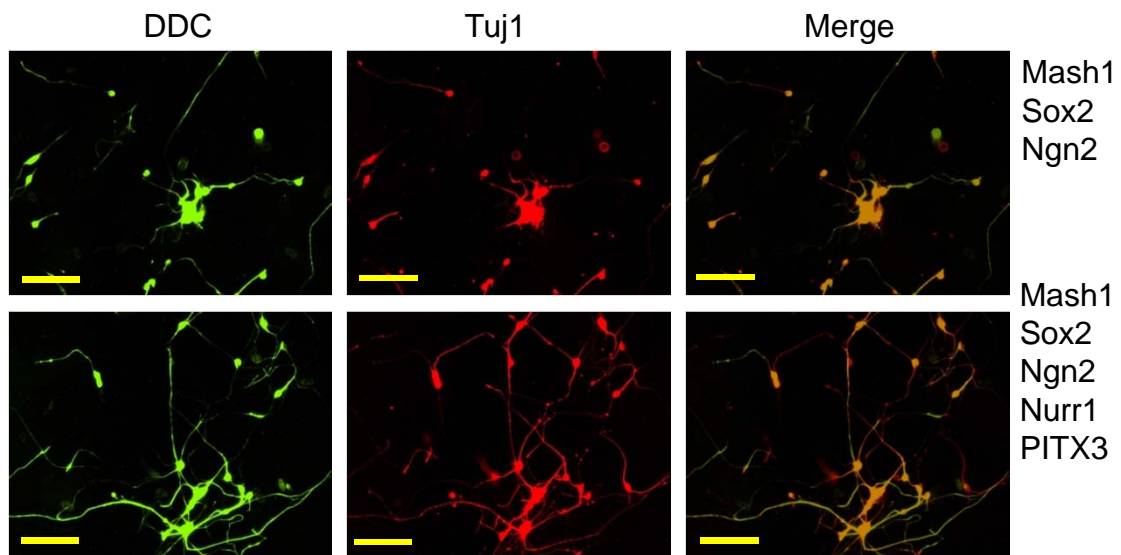

Figure S3. Increased dendrite network in 5F vs 3F transduced IMR90 cell at 18 days post gene transduction. Size bars represent 200  $\mu$ m.
