# Supplementary material for: Direct reprogramming of human fibroblasts into dopaminergic neuron-like cells
Source: PubMed Central journal article supplement — Cell Res. 2011 Nov 22;22(2):321–32. doi: 10.1038/cr.2011.181 (PMC3271588; doi:10.1038/cr.2011.181), 2011-11-22
Supplement: cr2011181x10.pdf [file cr2011181x10.pdf]

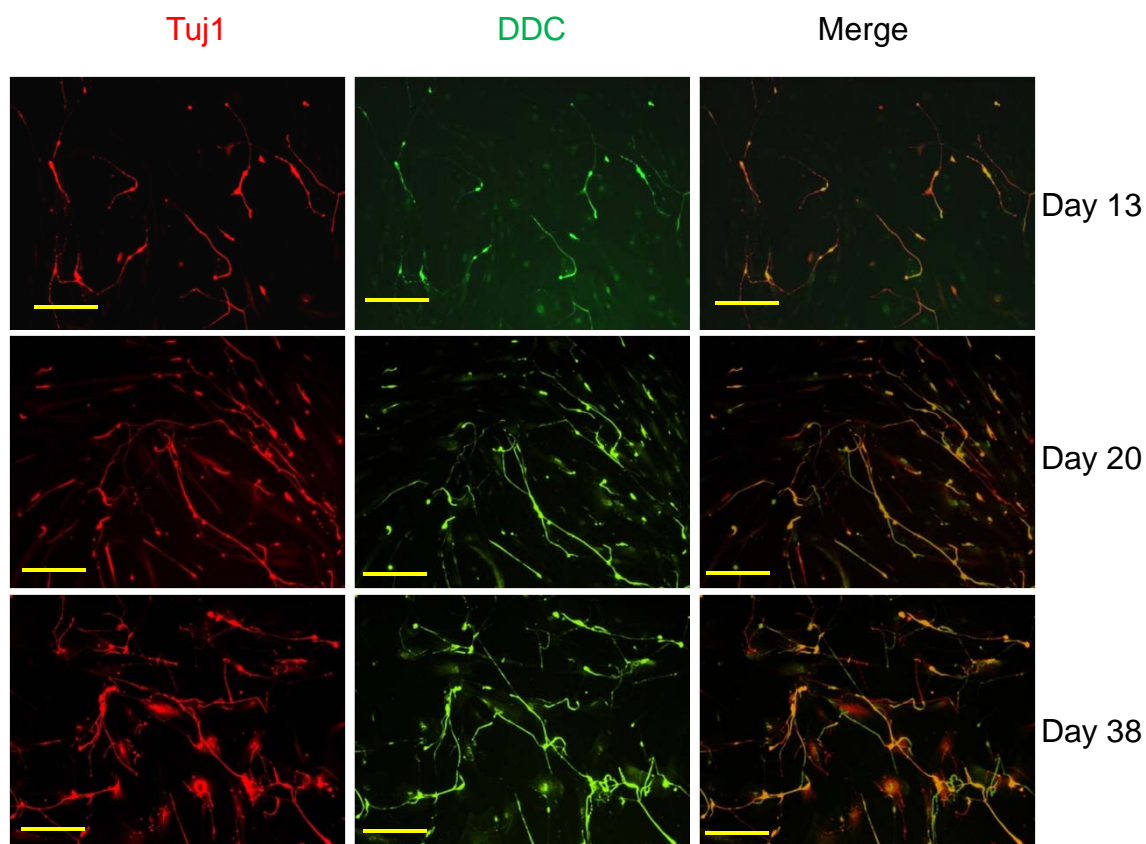

|       | DDC <sup>+</sup> / DIV X (%) <sup>*</sup> | DDC <sup>+</sup> / DIV0 (%) <sup>**</sup> |
|-------|-------------------------------------------|-------------------------------------------|
| DIV13 | 6.10±0.42                                 | 1.12±0.56                                 |
| DIV20 | 33.33±3.32                                | 1.27±0.50                                 |
| DIV38 | 51.64±6.52                                | 0.47±0.24                                 |

<sup>\*</sup>The percent of DDC positive cells on the indicated date; <sup>\*\*</sup>: The amount of DDC positive cells on the indicated date / the amount of cells on DIV0.

Figure S4. Top panel: Time dependent increase in dendrite-like structures observed in 5F transduced IMR90 cells (100x). Size bars represent 200  $\mu$ m. Lower panel: fraction of cells that showed positive staining for DDC.
