# Supplementary material for: Direct reprogramming of human fibroblasts into dopaminergic neuron-like cells
Source: PubMed Central journal article supplement — Cell Res. 2011 Nov 22;22(2):321–32. doi: 10.1038/cr.2011.181 (PMC3271588; doi:10.1038/cr.2011.181), 2011-11-22
Supplement: cr2011181x11.pdf [file cr2011181x11.pdf]

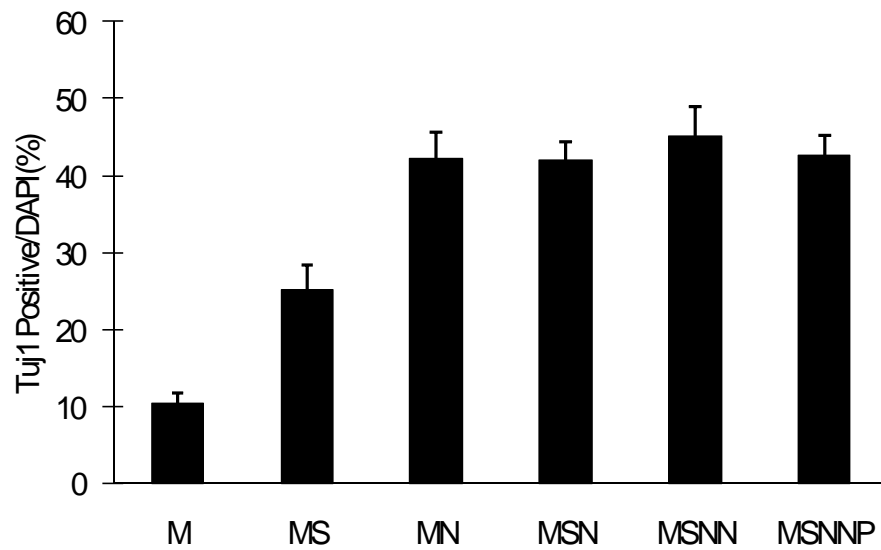

Figure S5. Fraction of surviving cells that stained positive for Tuj1 cell IMR90 cells transduced with various combinations of transcription factors. The error bars represent SEM, n=5. M: Mash1; MS: Mash1+Sox2; MN: Mash1+Ngn2; MSN: Mash1+Sox2+Ngn2; MSNN: Mash1+Sox2+Ngn2 +Nurr1; MSNNP: Mash1+ Sox2+Ngn2 +Nurr1+Pitx3.
