# Supplementary material for: Direct reprogramming of human fibroblasts into dopaminergic neuron-like cells
Source: PubMed Central journal article supplement — Cell Res. 2011 Nov 22;22(2):321–32. doi: 10.1038/cr.2011.181 (PMC3271588; doi:10.1038/cr.2011.181), 2011-11-22
Supplement: cr2011181x13.pdf [file cr2011181x13.pdf]

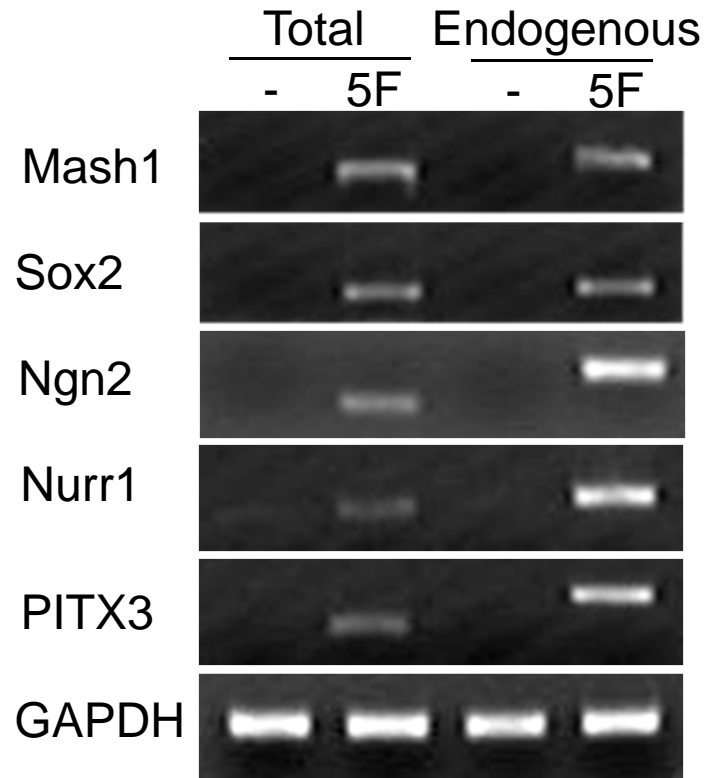

Figure S7. Semi-quantitative PCR analysis of the expression of five factors in parent IMR90 (as denoted by a “-” sign) as well 5F-transduced IMR90 cells. Total level indicates endogenous+exogenous expression while endogenous indicates expression from only the endogenous genes. The positions of the total and endogenous bands are different because different primers for total and endogenous PCR were used to distinguish the two. See Table S4 for specific primer sequences.
